# Supplementary material for: Constructing a core–shell Pt@MnOx/SiO2 catalyst for benzene catalytic combustion with excellent SO2 resistance: new insights into active sites
Source: Royal Society of Chemistry journal article supplement (doi:10.1039/d4en00071d), 2024-01-01
Supplement: d4en00071d1.pdf [file d4en00071d1.pdf]

## Supplementary Information

### **Constructing a core-shell Pt@MnO<sub>x</sub>/SiO<sub>2</sub> catalyst for benzene catalytic combustion with excellent SO<sub>2</sub> resistance: new insights into active sites**

Dan Yang<sup>a,b</sup>, Fang Dong<sup>b\*</sup>, Jie Wang<sup>a,b</sup>, Zhicheng Tang<sup>b\*</sup>, Jiyi Zhang<sup>a\*</sup>

*(<sup>a</sup> School of Petroleum and Chemical, Lanzhou University of Technology, Lanzhou  
730050, China.*

*<sup>b</sup> State Key Laboratory for Oxo Synthesis and Selective Oxidation, and National  
Engineering Research Center for Fine Petrochemical Intermediates, Lanzhou  
Institute of Chemical Physics, Chinese Academy of Sciences, Lanzhou, 730000,  
China.)*

---

\*Corresponding author.

E-mail address: [dongfang@licp.cas.cn](mailto:dongfang@licp.cas.cn) (F. Dong), [tangzhicheng@licp.cas.cn](mailto:tangzhicheng@licp.cas.cn) (Z. Tang),  
[zhangjiyi@lut.edu.cn](mailto:zhangjiyi@lut.edu.cn) (J. Zhang).

## 1.1 Catalyst Characterization

The morphology of the samples was evaluated with transmission electron microscope (TEM). The images of TEM and selected-area electron diffraction patterns were obtained under a microscope of 200 kV using FEI TECNAIG .

The specific surface area and pore diameter of the catalyst was measured on the Micromeritics ASAP 2010 analyzer by the method of low-temperature nitrogen adsorption and desorption.

Power X-ray diffraction (XRD) analysis was finished at 60 kV and 55 mA with a scanning speed of  $0.5^{\circ} \text{ min}^{-1}$ . The  $2\theta$  of wide-angle ranged from  $10^{\circ}$  to  $90^{\circ}$ .

Raman scattering was done by using a Laboratory Human Resources Evolution Raman spectrometer (BX41).

The XPS measurement was done on a Thermo Scientific 250Xi Electron Spectrometer (Mg  $K\alpha$  radiation;  $h\nu = 1253.6 \text{ eV}$ ).

The FTIR analysis of the sample adopts Fourier infrared spectrometer (Nexus 870, Nicolet), and ATR technology was used for FTIR analysis. Raman scattering was done by using a Laboratory Human Resources Evolution Raman spectrometer (BX41).

In situ diffuse reflectance infrared fourier transform spectroscopy (in situ DRIFTS) was collected on Bruker V70. The powder samples were degassed in  $\text{N}_2$  gas with 25 mL/min gas volume at  $300^{\circ}\text{C}$  for 30 min. After that, the samples were cooled to  $50^{\circ}\text{C}$ . Benzene is introduced continuously by a bubbling method with  $\text{N}_2$  as a carrier gas at  $50^{\circ}\text{C}$  for 30 min. To remove the weakly adsorbed benzene molecule, the samples were purged with  $\text{N}_2$  gas for another 5 min. Thereafter, an air gas and a mixture reaction gas

with air and 30 ppm SO<sub>2</sub> (25 mL/min) were respectively introduced into the in situ cell to react with benzene as requires. Finally, the samples were further heated to 100, 120, 140, 160, 180 and 300 °C to collect the corresponding spectra, respectively.

For H<sub>2</sub>-TPR, a 50 mg sample was pre-treated at an atmosphere of nitrogen. The temperature was increased from room temperature to 350 °C with a heating rate of 10 °C min<sup>-1</sup>. When it cooled down to room temperature, the temperature was increased from room temperature to 800 °C with a heating rate of 10 °C min<sup>-1</sup>. A reducing gas of 5 % vol. H<sub>2</sub> and 95 % vol. N<sub>2</sub> was passed on the sample at the same time.

For NH<sub>3</sub>-TPD, a 100 mg sample was pre-treated at an atmosphere of nitrogen. The temperature was increased from room temperature to 350 °C with a heating rate of 10 °C min<sup>-1</sup>. And it was treated for 90 min. When it cooled down to room temperature, the temperature was increased from room temperature to 50 °C for 60 min with a gas of 5 % vol. NH<sub>3</sub> and 95 % vol. N<sub>2</sub> passing through. Finally, the temperature was increased from room temperature to 600 °C with a heating rate of 10 °C min<sup>-1</sup>.

For O<sub>2</sub>-TPD, a 100 mg sample was pre-treated at an atmosphere of nitrogen. The temperature was increased from room temperature to 350 °C with a heating rate of 10 °C min<sup>-1</sup>. And it was treated for 90 min. When it cooled down to room temperature, the temperature was increased from room temperature to 30 °C for 60 min with a gas of 5 % vol. O<sub>2</sub> and 95 % vol. N<sub>2</sub> passing through. Finally, the temperature was increased from room temperature to 800 °C with a heating rate of 10 °C min<sup>-1</sup>.

## **1.2 The Calculation of $E_a$ (Activation energy) and R (reaction rate):**

Activation energy ( $E_a$ ) and reaction rate (r) is evaluated according to the Eqs. (3),

(4):

$$\ln r = \frac{-E_a}{RT} + C \quad (3)$$

The  $r$  represents the reaction rate ( $\text{mol s}^{-1} \text{ g}^{-1}$ ), the  $T$  represents the reaction temperature, the  $C$  represents a constant term.

$$r = \frac{F \times \left\{ -\ln \left[ \frac{1}{1-x} \right] \right\}}{m} \quad (4)$$

The  $F$  represents the feeding rate of benzene ( $\text{mol s}^{-1}$ ), and the  $m$  represents the mass of catalyst in the reaction tube.  $E_a$  is obtained by the linear relationship between  $\ln r$  and  $1000/T$  in the above formula.

### 1.3 The Calculation of Turnover Frequency (TOF):

Turnover frequency (TOF), defined as the number of benzene molecules converted per active site per second, is calculated according to the equation:

$$TOF = \frac{F_T * X_T}{\frac{(m_{cat} * w_{Pt})}{M_{Pt}} * d_{Pt}} \quad (5)$$

Where  $F_T$  is the benzene flow rate ( $\text{mol/h}$ ),  $X_T$  is the conversion of benzene,  $m_{cat}$  is the mass of the catalyst ( $\text{g}$ ),  $w_{Pt}$  is the mass percentage of Pt in the catalysts,  $M_{Pt}$  is the molar mass of Pt ( $195 \text{ g/mol}$ ), and  $d_{Pt}$  is the Pt dispersion. And  $d_{Pt}$  is calculated from the ratio of the active site  $\text{Pt}^0$  to the total area of Pt elements in the XPS spectrum.

**Table S1** The percentage of oxygen species by O<sub>2</sub>-TPD

| Samples                               | O <sub>α</sub> (%) | O <sub>α</sub> ' (%) | O <sub>β</sub> (%) | O <sub>α</sub> + O <sub>α</sub> ' (%) |
|---------------------------------------|--------------------|----------------------|--------------------|---------------------------------------|
| Pt/SiO <sub>2</sub>                   | 9.09               | 68.14                | 22.77              | 77.23                                 |
| Pt@CrO <sub>x</sub> /SiO <sub>2</sub> | 17.20              | 54.35                | 28.45              | 71.55                                 |
| Pt@VO <sub>x</sub> /SiO <sub>2</sub>  | 14.18              | 58.26                | 27.56              | 72.44                                 |
| Pt@MnO <sub>x</sub> /SiO <sub>2</sub> | 14.92              | 63.32                | 21.76              | 78.24                                 |

**Table S2** The percentage of surface acid sites by NH<sub>3</sub>-TPD

| Samples                               | Weak acid sites (%) | Medium and strong acid sites (%) | Strong acid sites (%) |
|---------------------------------------|---------------------|----------------------------------|-----------------------|
| Pt/SiO <sub>2</sub>                   | 12.87               | 78.07                            | 9.06                  |
| Pt@CrO <sub>x</sub> /SiO <sub>2</sub> | 14.58               | 59.34                            | 26.08                 |
| Pt@VO <sub>x</sub> /SiO <sub>2</sub>  | 18.58               | 67.04                            | 14.38                 |
| Pt@MnO <sub>x</sub> /SiO <sub>2</sub> | 24.16               | 50.89                            | 24.95                 |

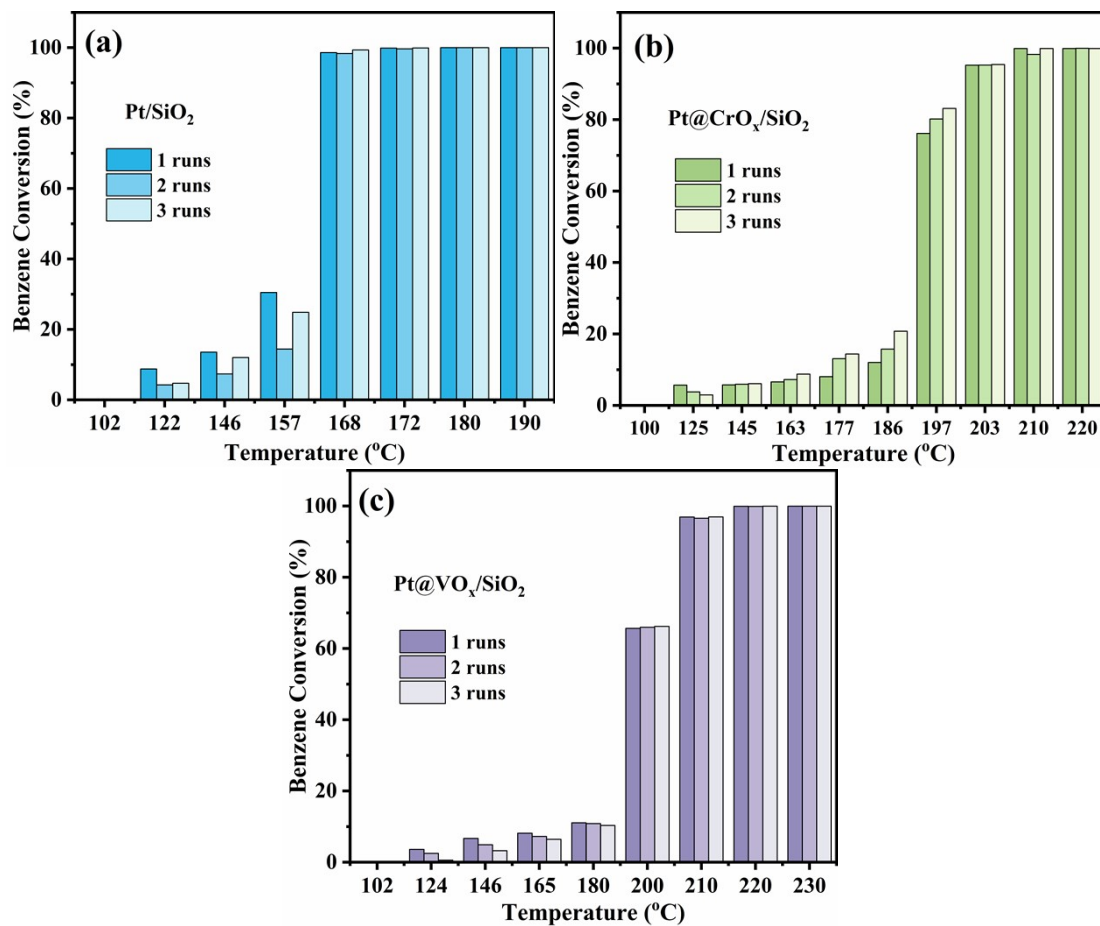

**Fig. S1** Cycling stability of benzene oxidation for three consecutive times over Pt/SiO<sub>2</sub> (a), Pt@CrO<sub>x</sub>/SiO<sub>2</sub> (b) and Pt@VO<sub>x</sub>/SiO<sub>2</sub> (c) catalysts.

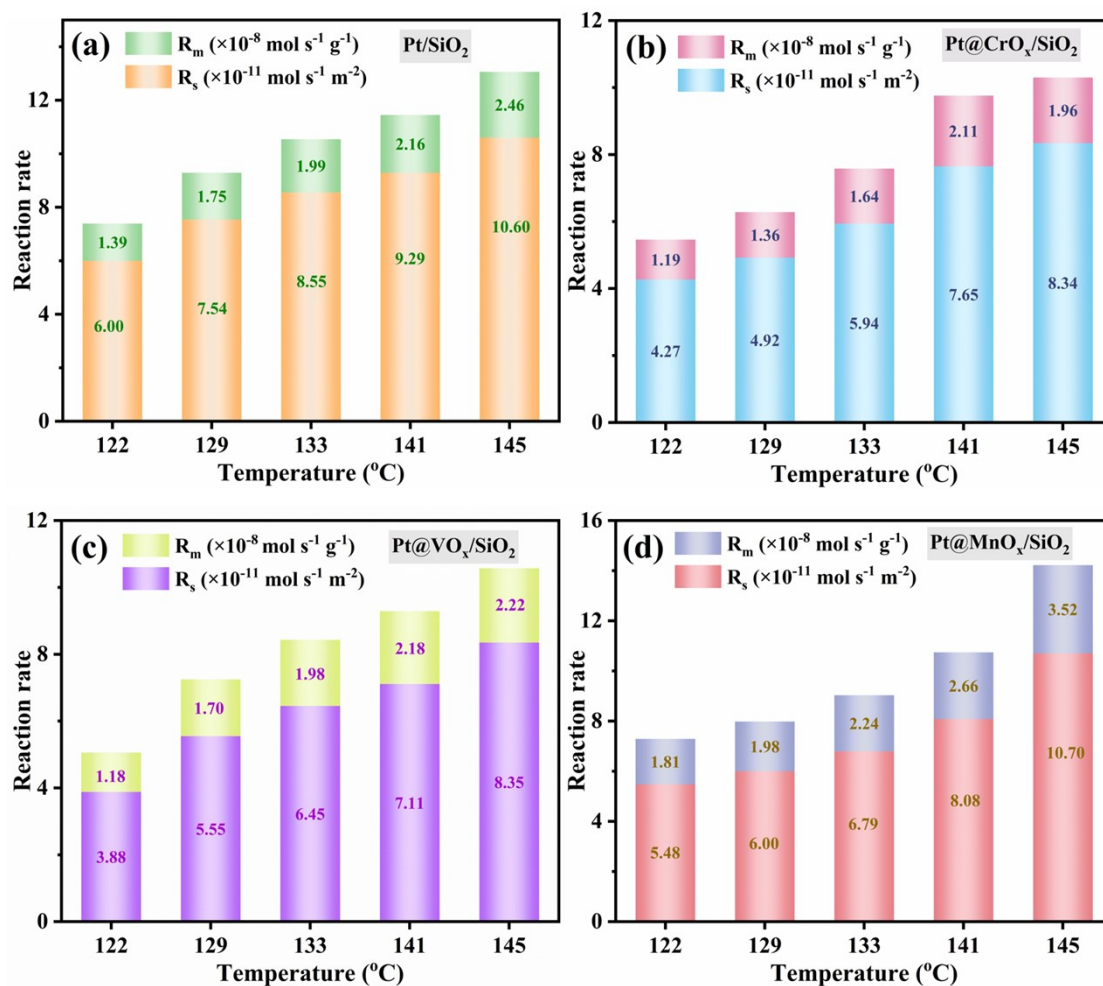

**Fig. S2** R<sub>s</sub> (reaction rates based on the specific area) and R<sub>m</sub> (reaction rates based on the catalyst mass) of Pt/SiO<sub>2</sub> (a), Pt@CrO<sub>x</sub>/SiO<sub>2</sub> (b), Pt@VO<sub>x</sub>/SiO<sub>2</sub> (c) and Pt@MnO<sub>x</sub>/SiO<sub>2</sub> (d) catalysts.



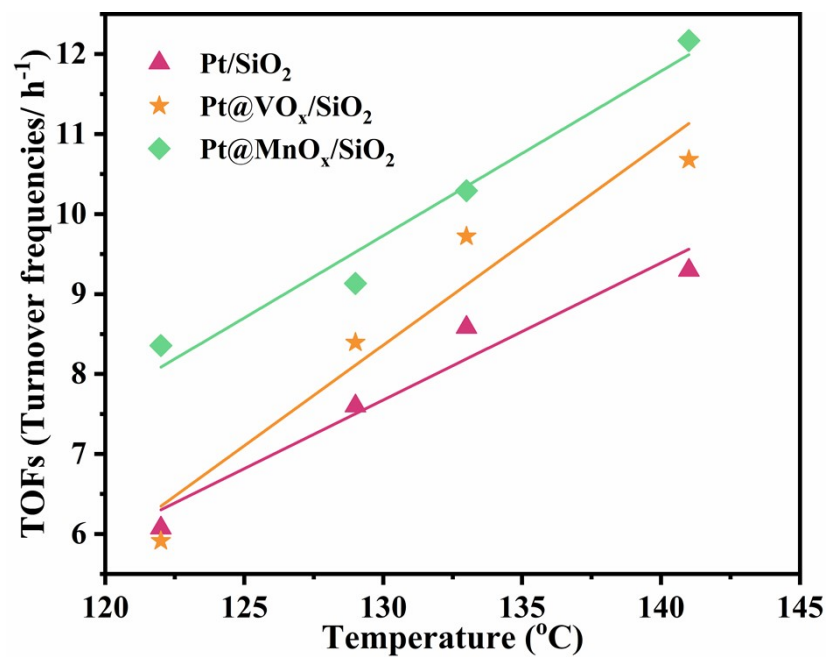

**Fig. S3** Reaction rates of Pt/SiO<sub>2</sub>, Pt@VO<sub>x</sub>/SiO<sub>2</sub> and Pt@MnO<sub>x</sub>/SiO<sub>2</sub> catalysts for benzene oxidation reaction: on basis of TOF value.

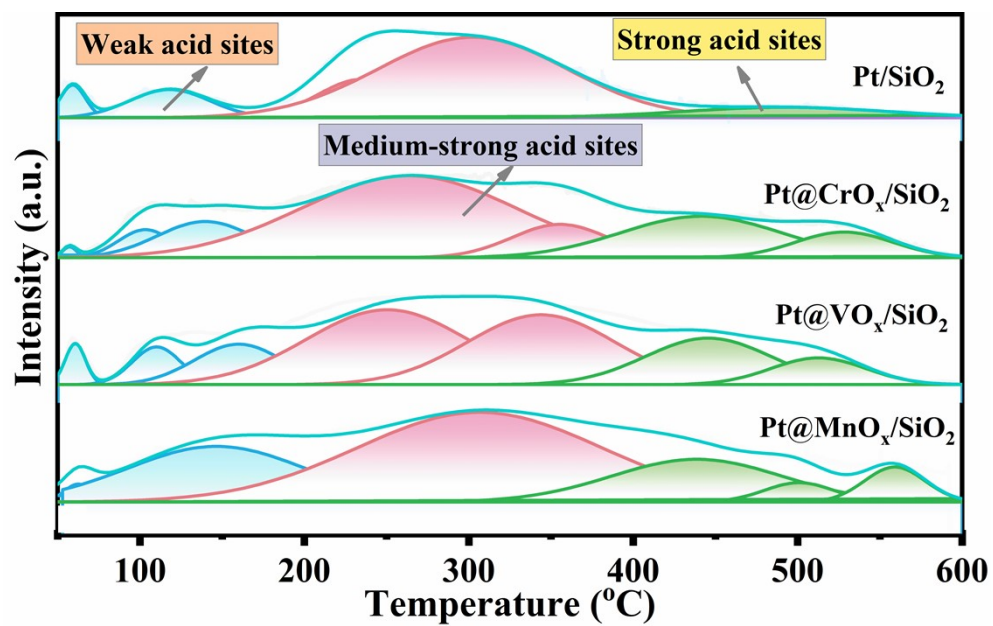

**Fig. S4** NH<sub>3</sub>-TPD analysis of Pt/SiO<sub>2</sub>, Pt@CrO<sub>x</sub>/SiO<sub>2</sub>, Pt@VO<sub>x</sub>/SiO<sub>2</sub> and Pt@MnO<sub>x</sub>/SiO<sub>2</sub> catalysts.

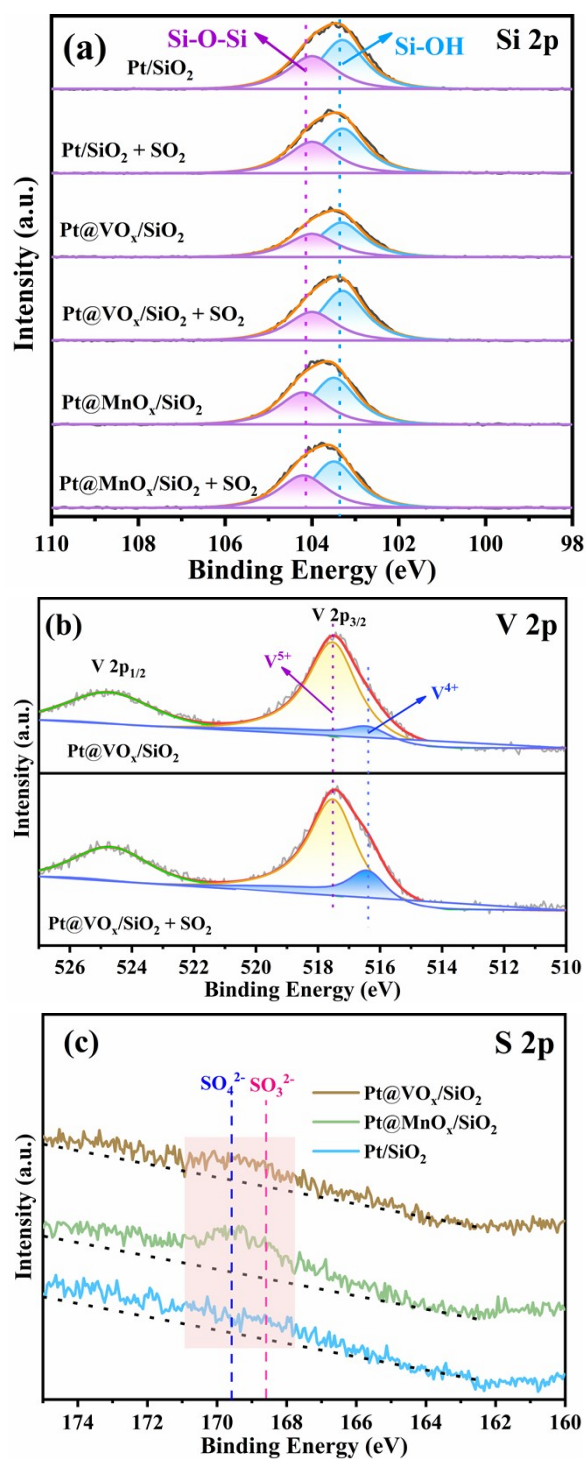

**Fig. S5** XPS spectra of Si 2p (a) for fresh and used catalysts of Pt/SiO<sub>2</sub>, Pt@VO<sub>x</sub>/SiO<sub>2</sub> and Pt@MnO<sub>x</sub>/SiO<sub>2</sub>; XPS spectra of V 2p (b) for fresh and used catalysts of Pt@VO<sub>x</sub>/SiO<sub>2</sub>; XPS spectra of S 2p (c) for Pt@VO<sub>x</sub>/SiO<sub>2</sub>, Pt@MnO<sub>x</sub>/SiO<sub>2</sub> and Pt/SiO<sub>2</sub> catalysts.

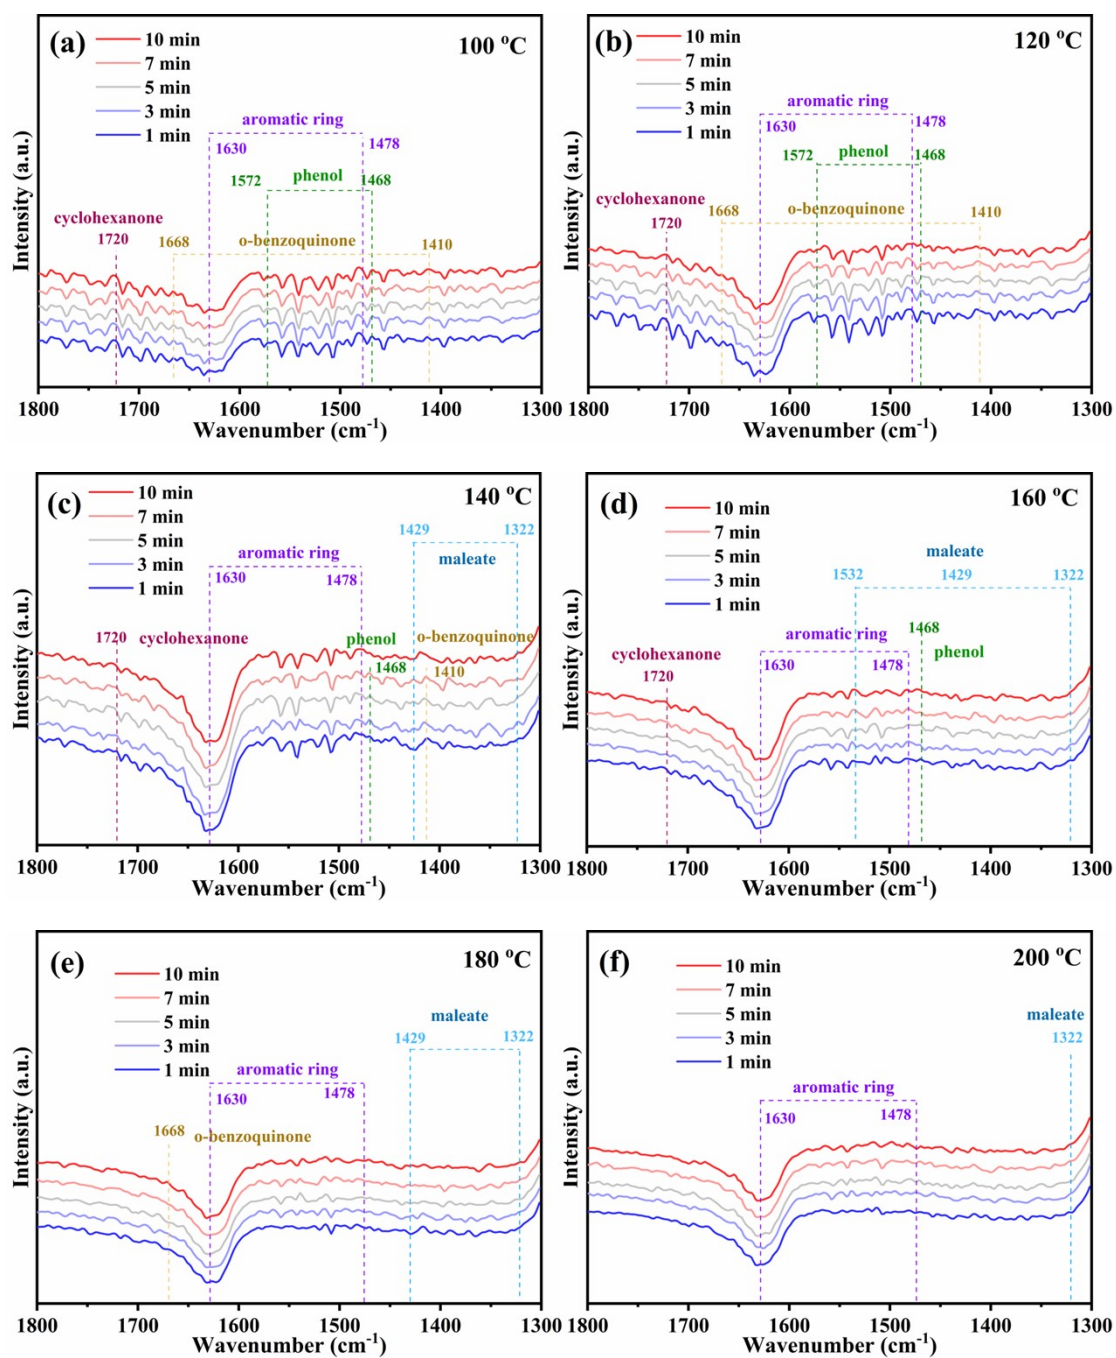

**Fig. S6** In situ DRIFT spectra of Pt@MnO<sub>x</sub>/SiO<sub>2</sub> catalyst exposed to air flow at different temperature for different times (a-f).

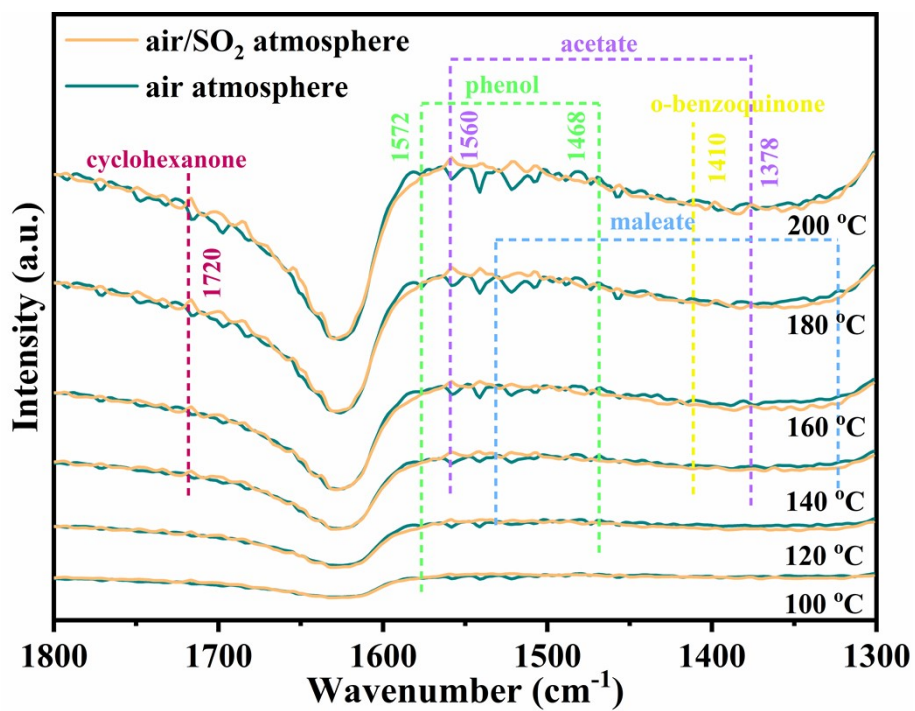

**Fig. S7** In situ DRIFT spectra diagram of Pt/SiO<sub>2</sub> catalyst reaction at different temperatures under two atmospheres.

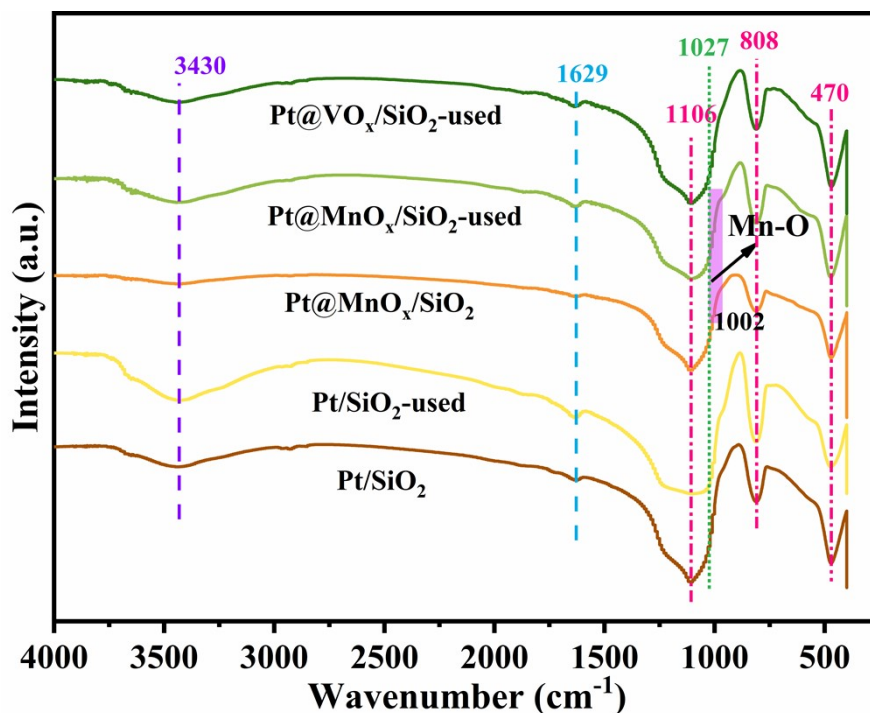

**Fig. S8** FTIR spectra of fresh and used samples of Pt/SiO<sub>2</sub>, Pt@MnO<sub>x</sub>/SiO<sub>2</sub> and used Pt@VO<sub>x</sub>/SiO<sub>2</sub> catalysts.

The peaks at 470 and 808 cm<sup>-1</sup> belong to the symmetric stretching vibration of Si-O-Si bond in SiO<sub>2</sub> carrier, and the characteristic peak nears 1106 cm<sup>-1</sup> can be attributed to the antisymmetric stretching vibration of siloxane bond. Besides, the spectral band at 1027 cm<sup>-1</sup> is associated with Si-O bond, while the bands at 3430 and 1629 cm<sup>-1</sup> are attributed to the O-H bond stretching vibrations of molecular water. Moreover, in the Pt@MnO<sub>x</sub>/SiO<sub>2</sub> catalyst, the band at 1002 cm<sup>-1</sup> is due to the vibration of the Mn-O bond, and the intensity of this peak increases in the used catalyst, which may be related to the re-dispersion of Mn species after the reaction.
